# Supplementary material for: Mitofusin 1-Mediated Redistribution of Mitochondrial Antiviral Signaling Protein Promotes Type 1 Interferon Response in Human Cytomegalovirus Infection
Source: PubMed Central journal article supplement (PMC10100850; doi:10.1128/spectrum.04615-22), 2023-03-20
Supplement: spectrum.04615-22-s0001.pdf [file spectrum.04615-22-s0001.pdf]

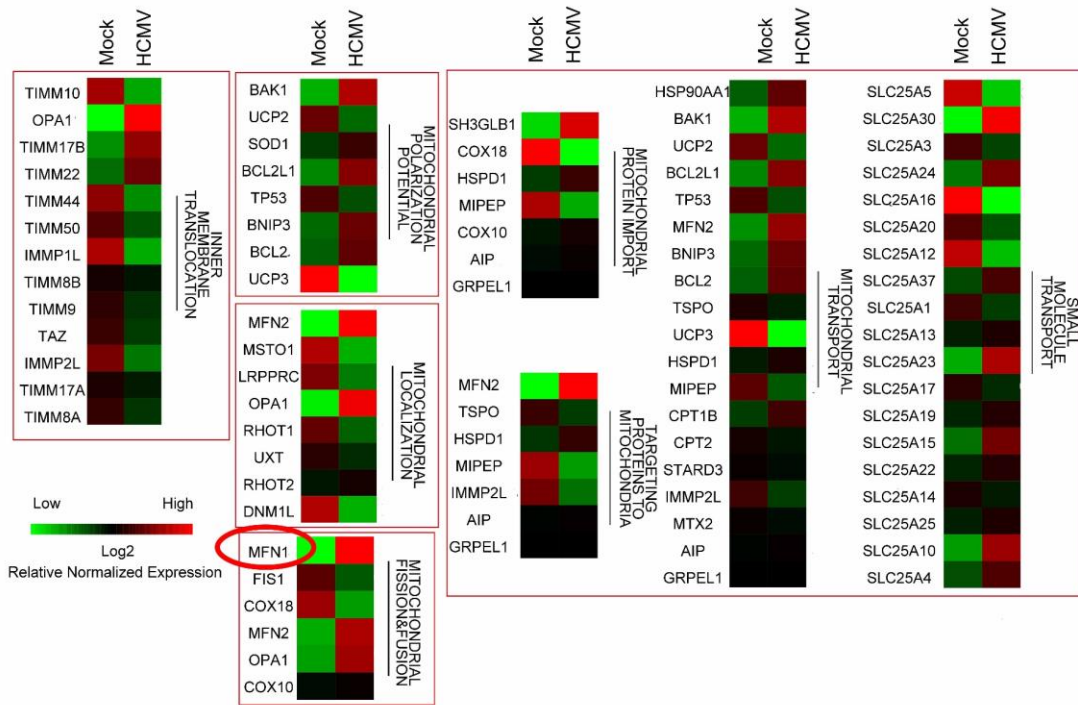

Supplementary Fig. 1:  
Heatmap analysis of mitochondrial related genes in control and THP-1 cells infected with HCMV (MOI=5) for 48h (data from GSE132048).

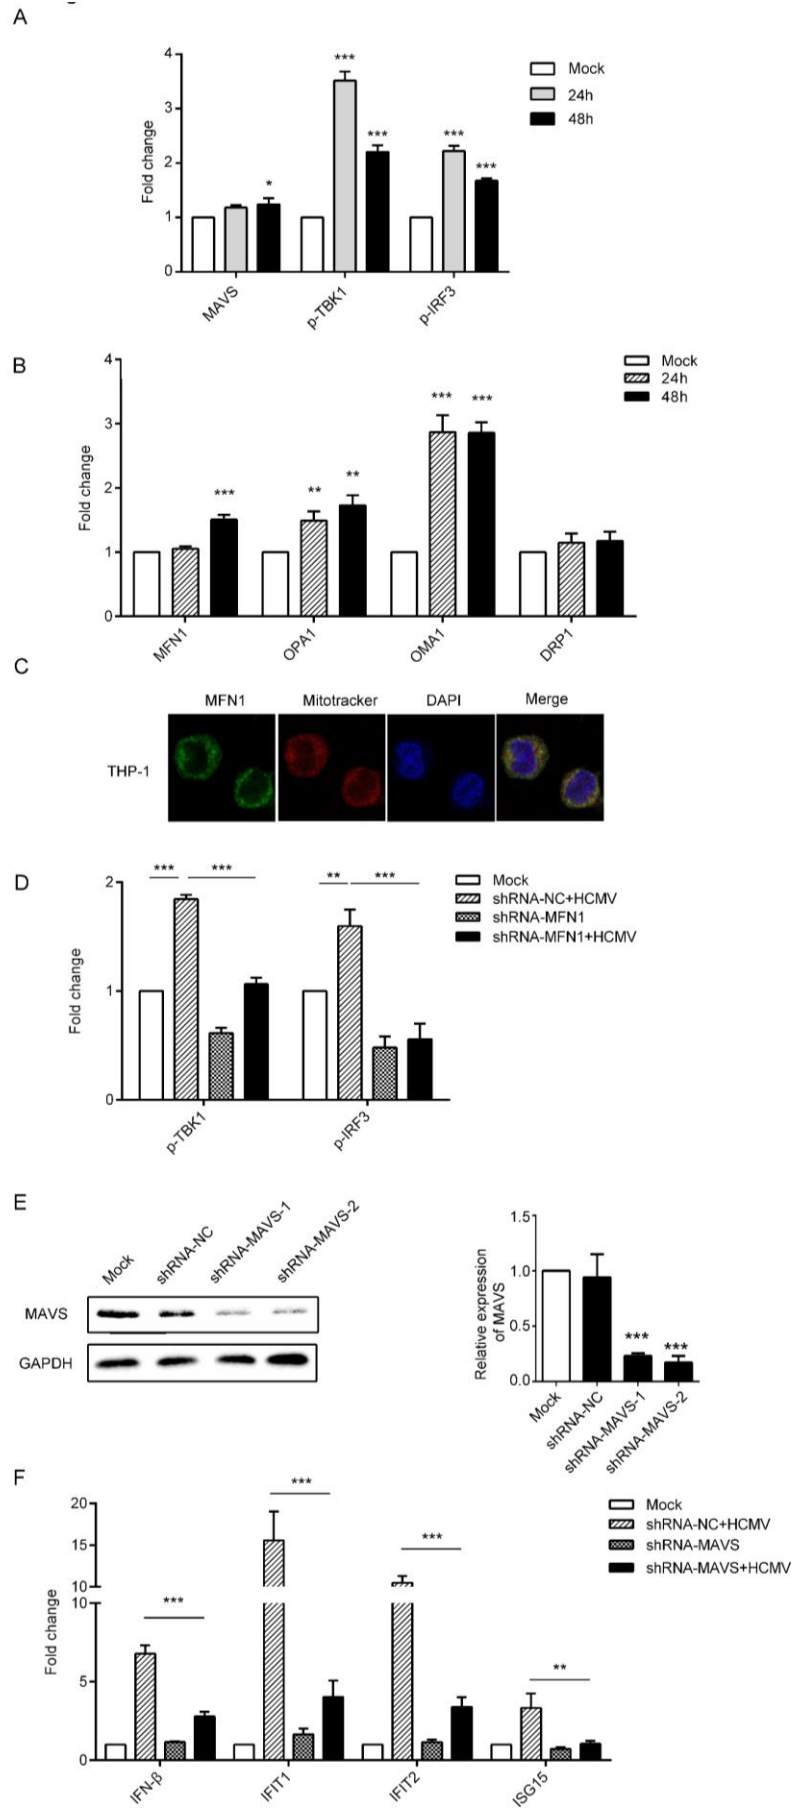

Supplementary Fig.2:

**A.** Quantitative analysis of the relative protein levels of MAVS, p-TBK1 and p-IRF3 in HCMV-infected THP-1 cells according to Fig.1B. **B.** Quantitative analysis of the relative protein levels of MFN1, OPA1, OMA1 and DRP1 in HCMV-infected THP-1 cells according to Fig.1D. **C.** THP-1 cells were stained with MitoTracker (Mitochondria) and anti-MFN1 antibody. Nuclei were visualized by staining with DAPI throughout this study. **D.** Quantitative analysis of the relative protein levels of p-TBK1 and p-IRF3 in control and MAVS-knockdown THP-1 cells according to Fig.2D. **E.** Western blot of MAVS in lysates from control and MAVS-knockdown THP-1 cells. **F.** The control shRNA treated and MAVS-knockdown THP-1 cells infected with HCMV (MOI=5) for 48 h, analyzed for *IFN- $\beta$* , *IFIT1*, *IFIT2* and *ISG15* mRNA expression relative to GAPDH mRNA by qPCR. Data are shown as the mean  $\pm$  SEM of three independent experiments. NS (non-significant),  $P>0.05$ ; \* $P<0.05$ ; \*\* $P<0.01$ ; \*\*\* $P<0.001$ .

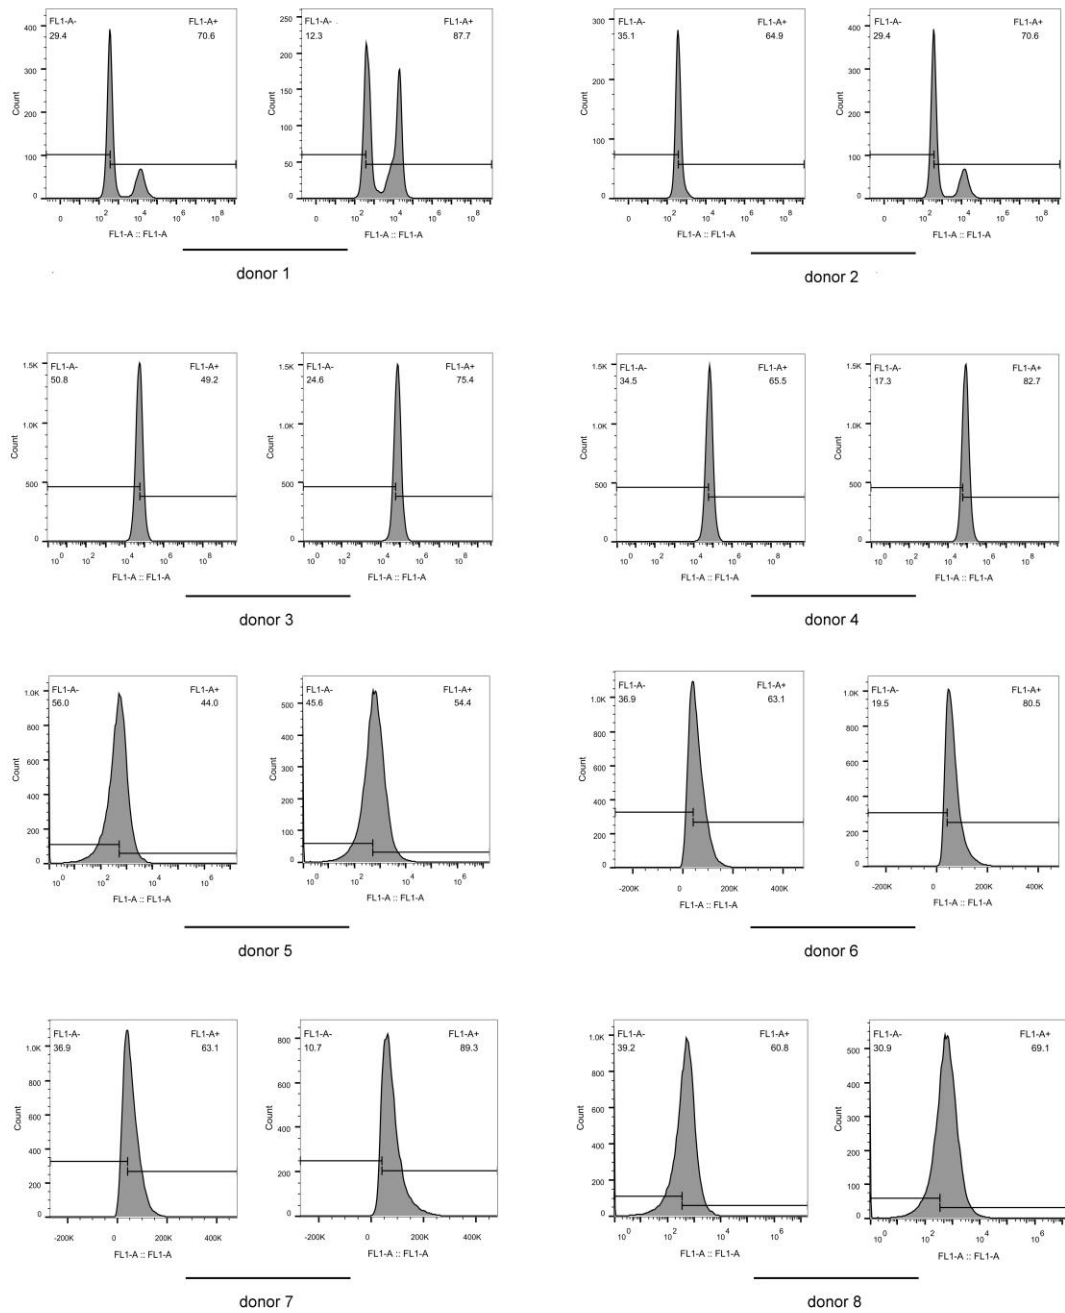

Supplementary Fig. 3:  
 Detection of MFN1 expression in peripheral blood mononuclear cells of 8 donors infected with HCMV by flow cytometry
